# Supplementary material for: A Missense Change in the ATG4D Gene Links Aberrant Autophagy to a Neurodegenerative Vacuolar Storage Disease
Source: PLoS Genet. 2015 Apr 15;11(4):e1005169. doi: 10.1371/journal.pgen.1005169 (PMC4398399; doi:10.1371/journal.pgen.1005169)
Supplement: S5 Table — (XLSX) [file pgen.1005169.s007.xlsx]

## Sheet: Sheet1
S5 Table. The sample cohort and ATG4D c.1288G>A genotypes.
Breed	Number of dogs	G/G genotype	G/A genotype	A/A genotype
Lagotto Romagnolo	2352	2061 (88%)	266 (11%)	25 (1%)
Barbet	78	78	-	-
Curly Coated Retriever	62	62	-	-
Irish Water Spaniel	45	45	-	-
Medium Poodle	56	56	-	-
Portuguese Water Dog	60	60	-	-
Spanish Water Dog	78	78	-	-
Australian Shepherd	8	8	-	-
Border Collie	8	8	-	-
Bearded Collie	8	8	-	-
Beagle	8	8	-	-
Briard	8	8	-	-
Chinese Crested Dog	8	8	-	-
Cairn Terrier	8	8	-	-
Cão da Serra de Aires	8	8	-	-
Dachshund	8	8	-	-
Doberman Pinscher	8	8	-	-
Standard Poodle	8	8	-	-
Golden Retriever	7	7	-	-
Greyhound	8	8	-	-
Labrador Retriever	8	8	-	-
Leonberger	8	8	-	-
Landseer	8	8	-	-
Belgian Shepherd Dog, Malinois	8	8	-	-
Mudi	8	8	-	-
Mexican Hairless Dog	6	6	-	-
Newfoundland	8	8	-	-
Schapendoes	8	8	-	-
Norwich Terrier	8	8	-	-
Peruvian Hairless Dog	7	7	-	-
Polish Lowland Sheepdog	8	8	-	-
Miniature Pinscher	6	6	-	-
Rhodesian Ridgeback	8	8	-	-
St. Bernard	7	7	-	-
Scottish Terrier	8	8	-	-
Siberian Husky	8	8	-	-
Whippet	8	8	-	-
Keeshond	8	8	-	-
West Highland White Terrier	7	7	-	-
Yorkshire Terrier	7	7	-	-
Pomeranian	8	8	-	-
Total	2994	2703	266	25
